# Supplementary material for: Insights into Chemical Bonds for Eliminating the Depletion Region and Accelerating the Photo-Induced Charge Efficient Separation toward Ultrasensitive Photoelectrochemical Sensing
Source: MDPI journal article supplement (doi:10.3390/bios13110984), 2023-11-13
Supplement: s1 [file s1]

# **Insights into Chemical Bonds for Eliminating the Depletion Region and Accelerating the Photo-Induced Charge Efficient Separation toward Ultrasensitive Photoelectrochemical Sensing**

Shuai Wang <sup>1</sup>, Haihan Yu <sup>1</sup>, Shenguang Ge <sup>2</sup>, Yanhu Wang <sup>1,3,\*</sup>, Chaomin Gao <sup>1,\*</sup>  
and Jinghua Yu <sup>1</sup>

<sup>1</sup> School of Chemistry and Chemical Engineering, University of Jinan, Jinan 250022, China

<sup>2</sup> Institute for Advanced Interdisciplinary Research, University of Jinan, Jinan 250022, China

<sup>3</sup> Key Laboratory for Applied Technology of Sophisticated Analytical Instruments of Shandong Province, Shandong Analysis and Test Center,  
Qilu University of Technology (Shandong Academy of Sciences), Jinan 250014, China

\* Correspondence: wyhloving633@163.com (Y.W.); chm\_gao@163.com (C.G.); Tel.: +86-0531-82767040 (C.G.)

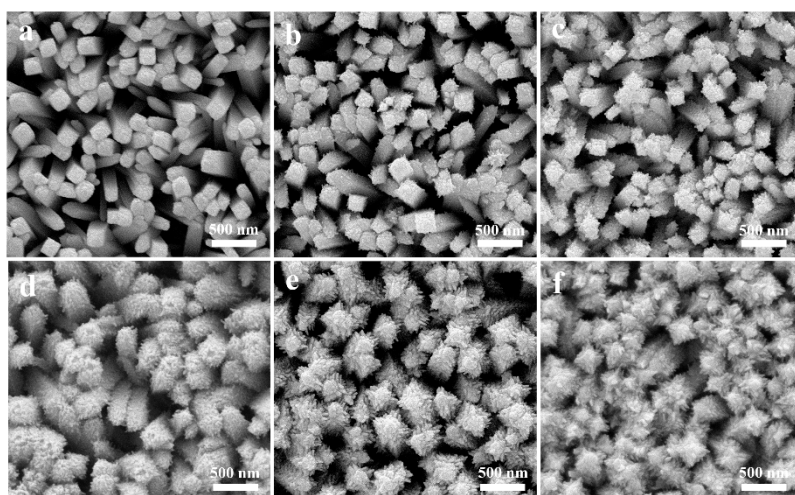

**Figure S1.** Time-dependent growth process of 3D HWT arrays sample. Typical SEM images of the HWT grown under the different reaction time: (a) 15 min, (b) 30 min, (c) 60 min, (d) 90 min, 120 min, 150 min.

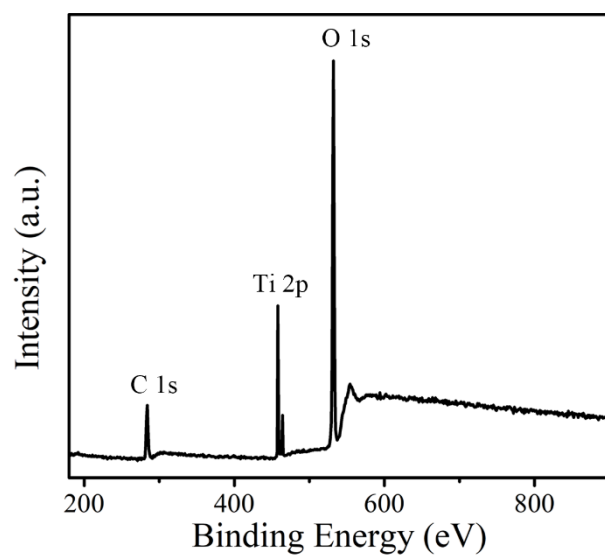

**Figure S2.** Full range XPS spectra of HWT-C sample.

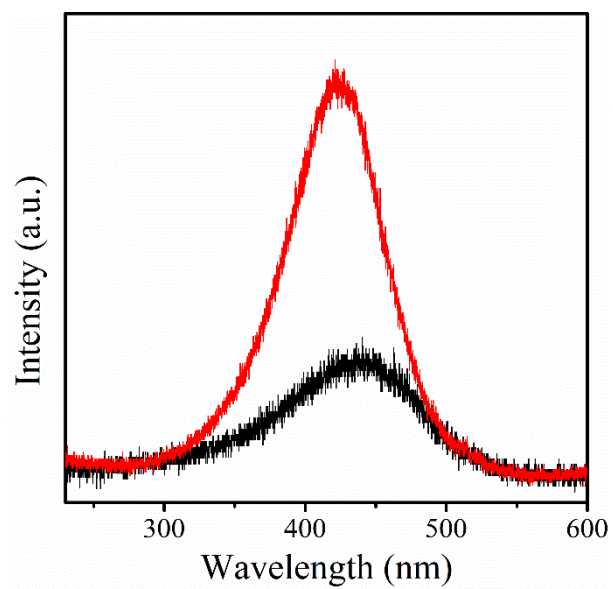

**Figure S3.** PL spectra of the HWT (red curve) and HWT-C (black curve) samples.

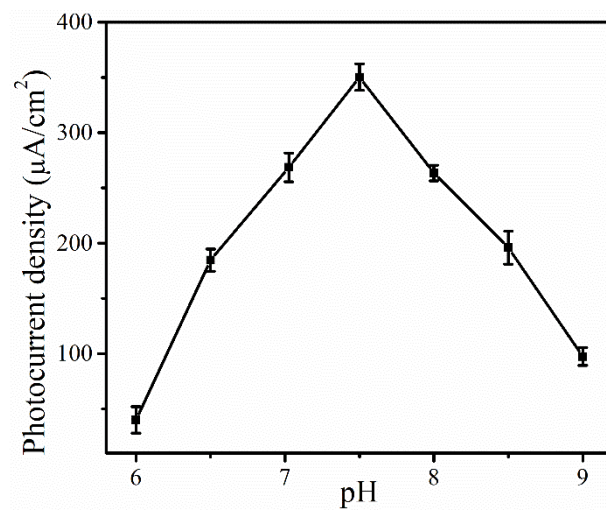

**Figure S4.** Effect of pH value on photocurrent responses of sensor platform with the PSA concentration of 0.6 pg/mL in PBS buffer.

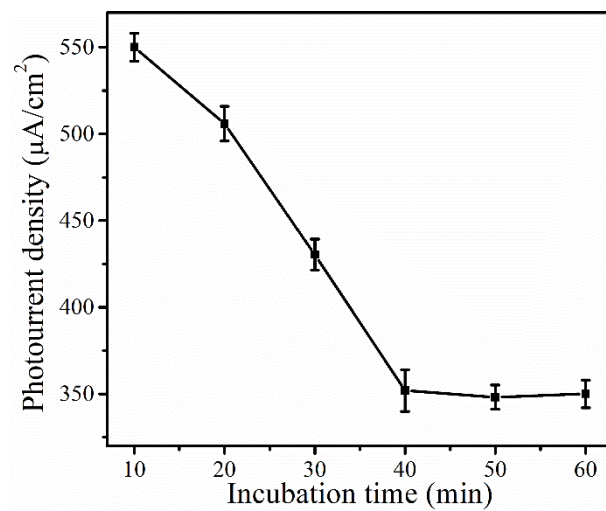

**Figure S5.** Effect of incubation time of antigen with antibody on photocurrent responses of sensor with the PSA concentration of 0.6 pg/mL in PBS buffer (0.01 mol/L, pH 7.4).

**Table S1.** Decay parameters and average lifetime according to a bi-exponential fitting model of the PL decay curves obtained from the samples.

| Samples | $\tau_1$ (ns) | $\tau_2$ (ns) | A <sub>1</sub> | A <sub>2</sub> | $\tau_{ave}$ (ns) |
|---------|---------------|---------------|----------------|----------------|-------------------|
| HWT     | 9.25          | 6.78          | 2.3            | 1.19           | 8.57              |
| HWT-C   | 4.33          | 3.68          | 4.6            | 2.12           | 4.14              |

**Table S2.** Comparison of previously reports methods for the detection of PSA.

| Methods                        | Linear range         | Detection limit | References |
|--------------------------------|----------------------|-----------------|------------|
| Differential pulse voltammetry | 2 ng/mL-80 ng/mL     | 1 pg/mL         | [2]        |
| Electrochemiluminescence       | 1 pg/mL-10 ng/mL     | 0.72 pg/mL      | [3]        |
| Immunochromatography           | 0.5 pg/mL-200 pg/mL  | 2.05 pg/mL      | [4]        |
| Biofuel cell                   | 0.3 pg/mL-7 ng/mL    | 0.1 pg/mL       | [5]        |
| Differential pulse voltammetry | 1 pg/mL-30 ng/mL     | 0.78 pg/mL      | [6]        |
| PEC                            | 0.02 pg/mL-100 ng/mL | 0.007 pg/mL     | This work  |

**Table S3.** Determination of PSA in human serum samples.

| Number | Content of PSA (ng/mL) | Detection | Recovery (%) |
|--------|------------------------|-----------|--------------|
| 1      | 0.02                   | 0.021     | 105          |
| 2      | 0.1                    | 0.098     | 98.0         |
| 3      | 1.0                    | 0.96      | 96           |
| 4      | 10.0                   | 10.2      | 102          |
| 5      | 50.0                   | 49.3      | 98.6         |
| 6      | 100.0                  | 98.5      | 98.5         |

**Table S4.** Comparison of previously other materials for the detection of PSA.

| Materials                                                       | Linear range         | Detection limit | References |
|-----------------------------------------------------------------|----------------------|-----------------|------------|
| Pt SA-Zn <sub>0.5</sub> Cd <sub>0.5</sub> S                     | 0.001 ng/mL-10 ng/mL | 0.22 pg/mL      | [7]        |
| PI5CA/WO <sub>3</sub>                                           | 0.5 pg/mL-50 ng/mL   | 0.12 pg/mL      | [8]        |
| CdS nanorods                                                    | 0.005 ng/mL-50 ng/mL | 0.0018 ng/mL    | [9]        |
| PDANP                                                           | 0.05 pg/mL-50 ng/mL  | 0.027 pg/mL     | [10]       |
| rGO-BiFeO <sub>3</sub>                                          | 10 pg/mL-100 ng/mL   | 0.3 pg/mL       | [11]       |
| Ag <sub>2</sub> S/CuS/ $\alpha$ -Fe <sub>2</sub> O <sub>3</sub> | 0.01 pg/mL-10 ng/mL  | 0.0033 pg/mL    | [12]       |
| ERGO-TiO <sub>2</sub>                                           | 0.02 pg/mL-200 ng/mL | 0.0068 pg/mL    | [13]       |
| 3D HWT-C                                                        | 0.02 pg/mL-100 ng/mL | 0.007 pg/mL     | This work  |

## References:

1. Gao, C.; Wei, T.; Zhang, Y.; Song, X.; Huan, Y.; Liu, H.; Zhao, M.; Yu, J.; Chen, X. A photoresponsive rutile TiO<sub>2</sub> heterojunction with enhanced electron-hole separation for high-performance hydrogen evolution. *Adv. Mater.* **2019**, *31*, 1806596.
2. Zhao, M.; Fan, G. C.; Chen, J. J.; Shi, J. J.; Zhu, J. J. Highly sensitive and selective photoelectrochemical biosensor for Hg<sup>2+</sup> detection based on dual signal amplification by exciton energy transfer coupled with sensitization effect. *Anal. Chem.* **2015**, *87*, 12340-12347.
3. Kavosi, B.; Salimi, A.; Hallaj, R.; Amani, K. A highly sensitive prostate-specific antigen immunosensor based on gold nanoparticles/PAMAM dendrimer loaded on MWCNTS/chitosan/ionic liquid nanocomposite. *Biosens. Bioelectron.* **2014**, *52*, 20-28.
4. Zhang, N.; Gao, H.; Xu, C. H.; Cheng, Y.; Chen, H. Y.; Xu, J. J. An Efficient Electrochemiluminescence Enhancement Strategy on Bipolar Electrode for Bioanalysis. *Anal. Chem.* **2019**, *91*, 12553-12559.
5. Fang, C. C. C.; Yang, Y. Q.; Wei-Kai, T.; Wang, Y. T.; Chan, Y. H. Multiplexed Detection of Tumor Markers with Multicolor Polymer Dot-Based Immunochromatography Test Strip. *Anal. Chem.* **2018**, *90*, 2134-2140.
6. Gao, C.; Zhang, L.; Wang, Y.; Yu, J.; Song, X. Visible-light driven biofuel cell based on hierarchically branched titanium dioxide nanorods photoanode for tumor marker detection. *Biosens. Bioelectron.* **2016**, *83*, 327-333.
7. Li, B.; Guo, L.; Chen, M.; Guo, Y.; Ge, L.; Kwok, H. F. Single-atom Pt-anchored Zn<sub>0.5</sub>Cd<sub>0.5</sub>S boosted photoelectrochemical immunoassay of prostate-specific antigen. *Biosens. Bioelectron.* **2022**, *202*, 114006.
8. Lu, Y.; Zhang, B.; Tian, Y.; Guo, Q.; Nie, G. Ultrasensitive ratiometric photoelectrochemical immunoassay for prostate specific antigen based on nanoscale heterojunction. *Sens. Actuat B: Chem.* **2021**, *326*, 128994.
9. Zhang, K.; Lv, S.; Lin, Z.; Li, M.; Tang, D. Bio-bar-code-based photoelectrochemical immunoassay for sensitive detection of prostate-specific antigen using rolling circle amplification and enzymatic biocatalytic precipitation. *Biosens. Bioelectron.* **2018**, *101*, 159-166.



10. Yao, L.; Xu, J.; Shi, M.; Huang, Y.; Fang, L.; Zhao, S.; Chen, Z. F.; Liang, H. Polydopamine nanoparticle-based multicolor proximity immunoassays for ultrasensitive, multiplexed analysis of proteins using isothermal quadratic amplification. *Sensor. Actuat B: Chem.* **2019**, *282*, 626-635.
11. Zhou, Q.; Lin, Y.; Zhang, K.; Li, M.; Tang, D. Reduced graphene oxide/BiFeO<sub>3</sub> nanohybrids-based signal-on photoelectrochemical sensing system for prostate-specific antigen detection coupling with magnetic microfluidic device. *Biosens. Bioelectron.* **2018**, *101*, 146-152.
12. Chen, M.; Wang, C.; Meng, H.; Mo, F.; Fu, Y. A novel signal self-enhancement photoelectrochemical immunosensor without addition of a sacrificial agent in solution based on Ag<sub>2</sub>S/CuS/ $\alpha$ -Fe<sub>2</sub>O<sub>3</sub> n-p-n heterostructure films. *Chem. Commun.* **2020**, *56*, 2300-2303.
13. Deng, K.; Wang, H.; Xiao, J.; Li, C.; Zhang, S.; Huang, H., Polydopamine nanospheres loaded with l-cysteine-coated cadmium sulfide quantum dots as photoelectrochemical signal amplifier for PSA detection. *Anal. Chim. Acta* **2019**, *1090*, 143-150.
